# Supplementary material
Source: PubMed Central journal article supplement (PMC6925585)
Supplement: DB190097SupplementaryData.pdf [file DB190097SupplementaryData.pdf]

SUPPLEMENTARY DATA

**Supplement to: Interaction between type 2 diabetes prevention strategies and genetic determinants of coronary artery disease on cardiometabolic risk factors.**

Jordi Merino, Kathleen A Jablonski, Josep M. Mercader, Steven E Kahn, Ling Chen, Maegan Harden, Linda M Delahanty, Maria Rosario G. Araneta, Geoffrey A Walford, Suzanne B.R. Jacobs, Uzoma N. Ibebuogu, Paul W. Franks, William C. Knowler, Jose C. Florez; for the Diabetes Prevention Program Research Group.

**Corresponding author's contact information:**

Jose C. Florez, MD, PhD  
Diabetes Prevention Program Coordinating Center  
The Biostatistics Center George Washington University  
6110 Executive Blvd, Suite 750  
Rockville, MD 20852, USA  
Phone: 617 643 3308  
Email: [dppmail@bsc.gwu.edu](mailto:dppmail@bsc.gwu.edu) and [jcflorez@partners.org](mailto:jcflorez@partners.org)

SUPPLEMENTARY DATA

**Supplementary Table 1.** Characteristics of genetic variants used to build the coronary artery disease polygenic risk score.

SUPPLEMENTARY DATA

**Supplementary Table 2.** Differences in baseline characteristics between the sample of participants included in this study and all Diabetes Prevention Program participants.

|                                        | DPP Study Sample<br>(n=2,658) | All DPP<br>(n=3,234)     | P<br>value* |
|----------------------------------------|-------------------------------|--------------------------|-------------|
| <b>Demographics</b>                    |                               |                          |             |
| Age, y                                 | 50.7 ± 10.7                   | 50.6 ± 10.7              | 0.444       |
| Sex, Female n (%)                      | 1,789 (67.3)                  | 2,191 (67.7)             | 0.242       |
| Race/Ethnicity, n (%)                  |                               |                          |             |
| White                                  | 1,476 (55.5)                  | 1,768 (54.7)             | <0.001      |
| African American                       | 537 (20.2)                    | 645 (19.9)               |             |
| Hispanic                               | 451 (17.0)                    | 508 (15.7)               |             |
| Other                                  | 194 ( 7.3)                    | 313 (9.6)                |             |
| Current Smoker, n (%)                  | 192 ( 7.2)                    | 226 (7.0)                | 0.306       |
| Hyperlipidemia n (%)                   | 136 ( 5.1)                    | 169 (5.2)                | 0.824       |
| On lipid lowering med, n (%)           | 126 (4.7)                     | 157 (4.9)                | 0.567       |
| Hypertension, n (%)                    | 427 (16.1)                    | 520 (16.1)               | 0.962       |
| Systolic blood pressure, mm Hg         | 124 ± 15                      | 124 ± 15                 | 0.893       |
| Diastolic blood pressure, mm Hg        | 78.3 ± 9.3                    | 78 ± 9                   | 0.625       |
| <b>Anthropometrics &amp; Lifestyle</b> |                               |                          |             |
| BMI, kg/m <sup>2</sup>                 | 34.1 ± 6.6                    | 34.0 ± 6.7               | 0.039       |
| Waist circumference, cm                | 105 ± 15                      | 105 ± 15                 | 0.047       |
| AHEI-2010, units                       | 46.4 ± 10.1                   | 44.2 ± 10.4 <sup>^</sup> | 0.001       |
| MET-hours/week <sup>#</sup>            | 9.5 (3.8, 20.2)               | 9.8 (3.9, 20.6)          | 0.286       |
| <b>Biochemical</b>                     |                               |                          |             |
| Fasting glucose, mmol/L                | 5.93 ± 0.45                   | 5.91 ± 0.46              | <0.001      |
| HOMA-IR, units <sup>#</sup>            | 6.18 (4.25, 8.95)             | 6.16 (4.22, 8.85)        | 0.252       |
| Total cholesterol, mmol/L              | 5.27± 0.94                    | 5.26 ± 0.94              | 0.437       |
| LDL-cholesterol, mmol/L                | 3.23 ± 0.85                   | 3.23 ± 0.85              | 0.734       |
| HDL-cholesterol, <sup>#</sup>          | 1.18 (0.96, 1.35)             | 1.10 (0.98, 1.30)        | 0.380       |

## SUPPLEMENTARY DATA

|                                    |                   |                   |       |
|------------------------------------|-------------------|-------------------|-------|
| Triglycerides, mmol/L <sup>#</sup> | 1.61 (1.19, 2.31) | 1.59 (1.12, 2.27) | 0.236 |
| CRP, mg/dl <sup>#</sup>            | 0.38 (0.17, 0.77) | 0.37 (0.17, 0.76) | 0.010 |
| tPA, ng/ml <sup>#</sup>            | 11.0 (8.8, 13.4)  | 10.9 (8.7, 13.4)  | 0.078 |
| Fibrinogen, umol/L                 | 11.3 ± 2.5        | 11.5 ± 2.6        | 0.305 |

---

Values are given as the mean ± SD or median (25th, 75th percentile)<sup>#</sup> except for qualitative variables expressed as n (%). BMI; Body mass index, HOMA-IR; homeostasis model assessment of insulin resistance, CRP; C-reactive protein, tPA, tissue plasminogen activator.

\**P* values are generated from a general estimating equation models. ^ n=3,175

SUPPLEMENTARY DATA

**Supplementary Table 3.** One-year change in lifestyle components.

|                             | <b>PBO<br/>(n=865)</b> | <b>MET<br/>(n=852)</b> | <b>ILS<br/>(n=869)</b> | <b>P Met vs<br/>PBO</b> | <b>P ILS vs<br/>PBO</b> |
|-----------------------------|------------------------|------------------------|------------------------|-------------------------|-------------------------|
| <b>Diet</b>                 |                        |                        |                        |                         |                         |
| 1-y change AHEI-2010, units | 1.49 ± 0.27            | 0.84 ± 0.27            | 4.22 ± 0.27            | 0.661                   | <0.001                  |
| <b>Physical activity</b>    |                        |                        |                        |                         |                         |
| 1-y change MET-hours/week   | 1.28 ± 1.05            | 1.46 ± 1.06            | 6.96 ± 1.05            | 0.588                   | <0.001                  |
| <b>Body weight loss, kg</b> | -0.53 ± 0.19           | -2.55 ± 0.19           | -6.9 ± 0.19            | <0.001                  | <0.001                  |

**Table Legend;** Values represents adjusted means ± SE. The change in physical activity is not normally distributed and has been ln transformed.

*P*-value extracted from general linear model adjusted for baseline lifestyle component, age at randomization, sex and ancestry markers.

Eating Index 2010 (AHEI-2010). MET-hours/week (Metabolic equivalents\*hours/week).

SUPPLEMENTARY DATA

**Supplementary Table 4.** Association between one-year change in body weight and one-year change in risk factors by study intervention.

| Cardiometabolic risk factor  | PBO<br>(n=888)          |                 | MET<br>(n=880)          |                 | ILS<br>(n=890)          |                 |
|------------------------------|-------------------------|-----------------|-------------------------|-----------------|-------------------------|-----------------|
|                              | $\beta$ (95% CI)        | <i>P</i> value* | $\beta$ (95% CI)        | <i>P</i> value* | $\beta$ (95% CI)        | <i>P</i> value* |
| BMI, kg/m <sup>2</sup>       | -0.11 (-0.012, -0.010)  | <0.001          | -0.011 (-0.012, -0.010) | <0.001          | -0.011 (-0.012, -0.010) | <0.001          |
| Waist circumference, cm      | -0.681 (-0.743, -0.619) | <0.001          | -0.626 (-0.703, -0.549) | <0.001          | -0.756 (-0.806, -0.706) | <0.001          |
| Fasting glucose <sup>#</sup> | 0.994 (0.993, 0.996)    | <0.001          | 0.995 (0.994, 0.996)    | <0.001          | 0.995 (0.994, 0.996)    | <0.001          |
| LDLc, mmol/L                 | -0.006 (-0.014, 0.002)  | 0.143           | -0.011 (-0.019, -0.003) | 0.008           | -0.016 (-0.021, -0.010) | <0.001          |
| HDLc, mmol/L                 | 0.003 (0.005, 0.007)    | 0.002           | 0.008 (0.006, 0.010)    | <0.001          | 0.004 (0.002, 0.006)    | <0.001          |
| Triglycerides <sup>#</sup>   | 0.981 (0.975, 0.990)    | <0.001          | 0.978 (0.974, 0.984)    | <0.001          | 0.981 (0.976, 0.989)    | <0.001          |
| Systolic BP, mmHg            | -0.456 (-0.612, -0.285) | <0.001          | -0.368 (-0.536, -0.199) | <0.001          | -0.374 (-0.494, -0.254) | <0.001          |
| Diastolic BP, mmHg           | -0.220 (-0.329, -0.111) | <0.001          | -0.197 (-0.309, -0.085) | <0.001          | -0.245 (-0.321, -0.169) | <0.001          |
| CRP <sup>#</sup>             | 0.966 (0.957, 0.975)    | <0.001          | 0.974 (0.964, 0.983)    | <0.001          | 0.964 (0.957, 0.971)    | <0.001          |
| tPA, ng/mL                   | -0.130 (-0.167, -0.093) | <0.001          | -0.175 (-0.214, -0.136) | <0.001          | -0.163 (-0.188, -0.137) | <0.001          |
| Fibrinogen, umol/L           | 0.010 (-0.017, 0.037)   | 0.412           | -0.004 (-0.020, 0.029)  | 0.784           | -0.013 (-0.048, 0.005)  | 0.151           |

**Table Legend;** Each cardiometabolic risk factor represents a separate linear regression model on the association between in cardiometabolic risk factor levels and body weight loss (1kg). Regression coefficients for natural log transformed CRFs<sup>#</sup> are expressed as exp( $\beta$ ) ratio of one-year change in coronary artery disease risk factors according to intervention group.

BMI; Body mass index, CRP; C-reactive protein, tPA, tissue plasminogen activator.

\**P*-value derived by general linear model adjusted for baseline risk factor, age at randomization, sex, and PCs ancestry markers.

SUPPLEMENTARY DATA

**Supplementary Table 5.** Association between one-year change in physical activity and one-year change in risk factors by study intervention.

| Cardiometabolic risk factor  | PBO<br>(n=888)         |                 | MET<br>(n=880)         |                 | ILS<br>(n=890)          |                 |
|------------------------------|------------------------|-----------------|------------------------|-----------------|-------------------------|-----------------|
|                              | $\beta$ (95% CI)       | <i>P</i> value* | $\beta$ (95% CI)       | <i>P</i> value* | $\beta$ (95% CI)        | <i>P</i> value* |
| BMI, kg/m <sup>2</sup>       | -0.024 (-0.051, 0.016) | 0.108           | -0.015 (-0.022, 0.015) | 0.458           | -0.030 (-0.053, -0.011) | 0.008           |
| Waist circumference, cm      | -0.084 (-0.195, 0.027) | 0.136           | -0.032 (-0.160, 0.097) | 0.629           | -0.227 (-0.439, -0.016) | 0.035           |
| Fasting glucose <sup>#</sup> | 0.097 (0.991, 1.003)   | 0.416           | 0.999 (0.997, 1.001)   | 0.837           | -0.998 (0.995, 1.001)   | 0.087           |
| LDLc, mmol/L                 | 0.003 (-0.008, 0.015)  | 0.554           | -0.011 (-0.023, 0.001) | 0.081           | -0.005 (-0.021, 0.011)  | 0.563           |
| HDLc, mmol/L                 | 0.001 (-0.003, 0.003)  | 0.907           | -0.002 (-0.006, 0.001) | 0.249           | 0.001 (-0.004, 0.006)   | 0.693           |
| Triglycerides <sup>#</sup>   | 0.996 (-0.980, 1.003)  | 0.235           | 0.997 (0.990, 1.005)   | 0.439           | 1.002 (0.991, 1.012)    | 0.759           |
| Systolic BP, mmHg            | -0.158 (-0.398, 0.081) | 0.196           | -0.150 (-0.399, 0.099) | 0.238           | -0.448 (-0.810, -0.087) | 0.015           |
| Diastolic BP, mmHg           | -0.021 (-0.178, 0.137) | 0.798           | -0.101 (-0.265, 0.063) | 0.226           | -0.314 (-0.545, -0.084) | 0.008           |
| CRP <sup>#</sup>             | 1.009 (0.995, 1.023)   | 0.187           | 1.004 (0.989, 1.013)   | 0.613           | 0.990 (0.967, 1.012)    | 0.368           |
| tPA, ng/mL                   | 0.006 (-0.054, 0.067)  | 0.837           | -0.027 (-0.091, 0.038) | 0.420           | -0.037 (-0.119, 0.046)  | 0.388           |
| Fibrinogen, umol/L           | 0.035 (-0.004, 0.073)  | 0.076           | 0.001 (-0.024, 0.051)  | 0.482           | 0.001 (-0.005, 0.005)   | 0.959           |

**Table Legend;** Each cardiometabolic risk factor represents a separate linear regression model on the association between in cardiometabolic risk factor levels and increment of 10 MET-hours/week. Regression coefficients for natural log transformed CRFs<sup>#</sup> are expressed as exp( $\beta$ ) ratio of one-year change in coronary artery disease risk factors according to intervention group.

BMI; Body mass index, CRP; C-reactive protein, tPA, tissue plasminogen activator.

\**P*-value derived by general linear model adjusted for baseline risk factor, age at randomization, sex, and PCs ancestry markers.

SUPPLEMENTARY DATA

**Supplementary Table 6.** Association between one-year change in dietary score and one-year change in risk factors by study intervention.

| Cardiometabolic risk factor  | PBO<br>(n=888)          |                 | MET<br>(n=880)          |                 | ILS<br>(n=890)          |                 |
|------------------------------|-------------------------|-----------------|-------------------------|-----------------|-------------------------|-----------------|
|                              | $\beta$ (95% CI)        | <i>P</i> value* | $\beta$ (95% CI)        | <i>P</i> value* | $\beta$ (95% CI)        | <i>P</i> value* |
| BMI, kg/m <sup>2</sup>       | -0.060 (-0.108, -0.013) | 0.011           | -0.071 (-0.150, -0.006) | 0.005           | -0.094 (-0.158, -0.026) | <0.001          |
| Waist circumference, cm      | -0.314 (-0.774, 0.146)  | 0.181           | -0.703 (-1.241, -0.192) | 0.007           | -1.294 (-1.852, -0.192) | <0.001          |
| Fasting glucose <sup>#</sup> | 0.994 (0.983, 1.005)    | 0.231           | 0.997 (0.982, 1.010)    | 0.712           | 0.995 (0.988, 1.004)    | 0.253           |
| LDLc, mmol/L                 | -0.011 (-0.058, -0.035) | 0.648           | 0.030 (-0.016, 0.076)   | 0.206           | -0.041 (-0.084, 0.001)  | 0.056           |
| HDLc, mmol/L                 | 0.003 (-0.001, 0.015)   | 0.662           | 0.013 (-0.001, 0.027)   | 0.056           | 0.022 (0.008, 0.036)    | 0.002           |
| Triglycerides <sup>#</sup>   | 0.990 (0.961, 1.002)    | 0.539           | 0.966 (0.938, 0.996)    | 0.018           | 0.951 (0.928, 0.989)    | 0.008           |
| Systolic BP, mmHg            | -0.222 (-1.127, 0.762)  | 0.658           | -0.811 (-1.794, -0.173) | 0.106           | -0.798 (-1.765, -0.170) | 0.106           |
| Diastolic BP, mmHg           | -0.018 (-0.665, 0.629)  | 0.957           | -0.783 (-1.429, -0.136) | 0.018           | -0.256 (-0.877, -0.365) | 0.419           |
| CRP <sup>#</sup>             | 0.933 (0.886, 0.990)    | 0.019           | 0.996 (0.943, 1.064)    | 0.914           | 0.938 (0.863, 0.980)    | 0.011           |
| tPA, ng/mL                   | -0.126 (-0.375, 0.123)  | 0.320           | -0.103 (-0.338, 0.132)  | 0.388           | -0.165 (-0.388, 0.057)  | 0.145           |
| Fibrinogen, umol/L           | -0.017 (-0.174, 0.139)  | 0.829           | -0.172 (-0.320, -0.024) | 0.023           | -0.133 (-0.276, 0.010)  | 0.067           |

**Table Legend;** Each cardiometabolic risk factor represents a separate linear regression model on the association between in cardiometabolic risk factor levels and increment of 10 units in the dietary score. Regression coefficients for natural log transformed CRFs<sup>#</sup> are expressed as exp( $\beta$ ) ratio of one-year change in coronary artery disease risk factors according to intervention group.

BMI; Body mass index, CRP; C-reactive protein, tPA, tissue plasminogen activator.

\**P*-value derived by general linear model adjusted for baseline risk factor, age at randomization, sex, and PCs ancestry markers.



SUPPLEMENTARY DATA

**Supplementary Table 7.** Modification of coronary artery disease genetic risk effect on one-year change in intermediate risk factors by lifestyle components.

| One-year change in risk factor | One-year change in LS component | Treatment arm | Low genetic risk     | Intermediate genetic risk | High genetic risk    | <i>P</i> <sub>interaction</sub> |
|--------------------------------|---------------------------------|---------------|----------------------|---------------------------|----------------------|---------------------------------|
|                                |                                 |               | $\beta$ (SE)         | $\beta$ (SE)              | $\beta$ (SE)         |                                 |
| BMI, kg/m <sup>2</sup>         | Diet                            | MET           | -0.191 (0.095)       | -0.288 (0.103)            | -0.515 (0.114)       | 0.012                           |
| BMI, kg/m <sup>2</sup>         | PA                              | MET           | -0.003 (0.018)       | -0.261 (0.098)            | -0.323 (0.123)       | 0.014                           |
| Triglycerides <sup>#</sup>     | Diet                            | MET           | 0.996 (0.960, 1.031) | 0.969 (0.925, 1.016)      | 0.934 (0.892, 0.977) | 0.024                           |
| Fasting glucose <sup>#</sup>   | PA                              | PBO           | 1.005 (0.991, 1.021) | 0.993 (0.983, 1.002)      | 0.989 (0.977, 1.000) | 0.012                           |
| HDLc, mmol/L                   | PA                              | PBO           | 0.022 (0.009)        | -0.011 (0.009)            | -0.012 (0.008)       | 0.033                           |

**Table Legend:** Predicted one-year changes on cardiometabolic risk factors by 1SD increase in lifestyle behaviors among individuals at low, intermediate, and high genetic risk. *P*<sub>interaction</sub> values were derived by general linear models with interaction terms for CAD PRS and lifestyle behaviors (dietary quality score or physical activity), after adjustment for age at randomization, sex, the top 10 principal components for ancestry, and the respective baseline cardiac risk factors. For non-normally distributed variables<sup>#</sup>, we calculated the natural log year 1 value minus natural log baseline value. incidence. Displayed only nominal significant interactions.

BMI, body mass index; MET, metformin; PBO, placebo.

SUPPLEMENTARY DATA

**Supplementary Figure 1.** Coronary artery disease polygenic risk score distribution.

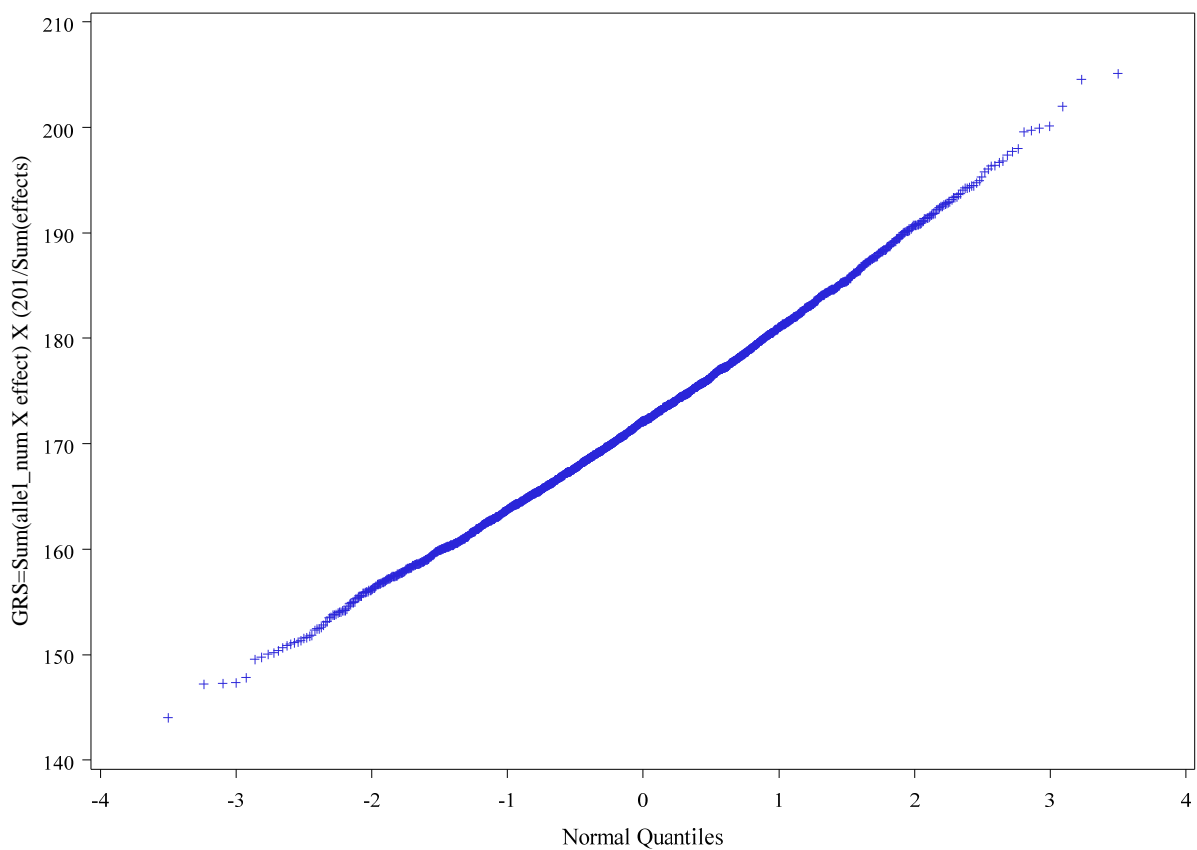

**Figure legend;** Q-Q plot for the distribution of the CAD polygenic risk score. The y axis displays CAD polygenic risks core values. The x axes represent quartiles of the distribution in the CAD polygenic risk score.

SUPPLEMENTARY DATA

**Supplementary Figure 2.** Adjusted-mean values of baseline lipid and diastolic blood pressure levels according quartiles of the genetic risk score.

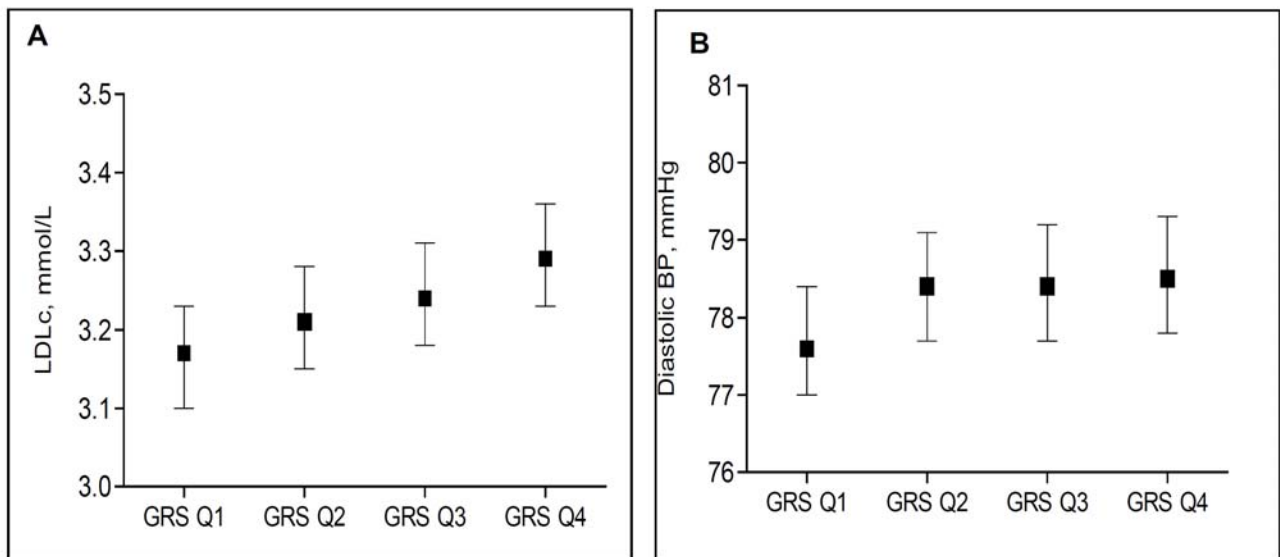

**Figure legend;** Baseline mean concentrations of intermediate risk factors according to the number of risk alleles at identified CAD loci, weighted by effect size in an aggregate genotype score. The right y axis displays adjusted mean and 95% confidence interval values of LDLc (A) and DBP (B) according to PRS quartiles. P-value was obtained from general linear models after adjustment for age at randomization, sex, and ancestry markers.  $P < 0.001$  for LDLc and 0.027 for DBP.

## SUPPLEMENTARY DATA

### DPP Research Group members

#### *Pennington Biomedical Research Center (Baton Rouge, LA)*

George A. Bray, MD\*  
Iris W. Culbert, BSN, RN, CCRC\*\*  
Catherine M. Champagne, PhD, RD  
Barbara Eberhardt, RD, LDN  
Frank Greenway, MD  
Fonda G. Guillory, LPN  
April A. Herbert, RD  
Michael L. Jeffers, LPN  
Betty M. Kennedy, MPA  
Jennifer C. Lovejoy, PhD  
Laura H. Morris, BS  
Lee E. Melancon, BA, BS  
Donna Ryan, MD  
Deborah A. Sanford, LPN  
Kenneth G. Smith, BS, MT  
Lisa L. Smith, BS  
Julia A. St. Amant, RTR  
Richard T. Tulley, PhD  
Paula C. Vicknair, MS, RD  
Donald Williamson, PhD  
Jeffery J. Zachwieja, PhD

#### *University of Chicago (Chicago, IL)*

Kenneth S. Polonsky, MD\*  
Janet Tobian, MD, PhD\*  
David Ehrmann, MD\*  
Margaret J. Matulik, RN, BSN\*\*  
Bart Clark, MD  
Kirsten Czech, MS  
Catherine DeSandre, BA  
Ruthanne Hilbrich, RD  
Wylie McNabb, EdD  
Ann R. Semenske, MS, RD

#### *Jefferson Medical College (Philadelphia, PA)*

Jose F. Caro, MD\*  
Pamela G. Watson, RN, ScD\*  
Barry J. Goldstein, MD, PhD\*  
Kellie A. Smith, RN, MSN\*\*  
Jewel Mendoza, RN, BSN\*\*  
Renee Liberoni, MPH  
Constance Pepe, MS, RD  
John Spandorfer, MD

#### *University of Miami (Miami, FL)*

Richard P. Donahue, PhD\*  
Ronald B. Goldberg, MD\*  
Ronald Prineas, MD, PhD\*  
Patricia Rowe, MPA\*\*  
Jeanette Calles, MSED  
Paul Cassanova-Romero, MD

Hermes J. Florez, MD  
Anna Giannella, RD, MS  
Lascelles Kirby, MS  
Carmen Larreal  
Valerie McLymont, RN  
Jadell Mendez  
Juliet Ojito, RN  
Arlette Perry, PhD  
Patrice Saab, PhD

#### *The University of Texas Health Science Center (San Antonio, TX)*

Steven M. Haffner, MD, MPH\*  
Maria G. Montez, RN, MSHP, CDE\*\*  
Carlos Lorenzo, MD, PhD  
Arlene Martinez, RN, BSN, CDE

#### *University of Colorado (Denver, CO)*

Richard F. Hamman, MD, DrPH\*  
Patricia V. Nash, MS\*\*  
Lisa Testaverde, MS\*\*  
Denise R. Anderson, RN, BSN  
Larry B. Ballonoff, MD  
Alexis Bouffard, MA,  
B. Ned Calonge, MD, MPH  
Lynne Delve  
Martha Farago, RN  
James O. Hill, PhD  
Shelley R. Hoyer, BS  
Bonnie T. Jortberg, MS, RD, CDE  
Dione Lenz, RN, BSN  
Marsha Miller, MS, RD  
David W. Price, MD  
Judith G. Regensteiner, PhD  
Helen Seagle, MS, RD  
Carissa M. Smith, BS  
Sheila C. Steinke, MS  
Brent VanDorsten, PhD

#### *Joslin Diabetes Center (Boston, MA)*

Edward S. Horton, MD\*  
Kathleen E. Lawton, RN\*\*  
Ronald A. Arky, MD  
Marybeth Bryant  
Jacqueline P. Burke, BSN  
Enrique Caballero, MD  
Karen M. Callaphan, BA  
Om P. Ganda, MD  
Therese Franklin  
Sharon D. Jackson, MS, RD, CDE  
Alan M. Jacobsen, MD  
Lyn M. Kula, RD  
Margaret Kocal, RN, CDE  
Maureen A. Malloy, BS  
Maryanne Nicosia, MS, RD

## SUPPLEMENTARY DATA

Cathryn F. Oldmixon, RN  
Jocelyn Pan, BS, MPH  
Marizel Quitingon  
Stacy Rubtchinsky, BS  
Ellen W. Seely, MD  
Dana Schweizer, BSN  
Donald Simonson, MD  
Fannie Smith, MD  
Caren G. Solomon, MD, MPH  
James Warram, MD

### ***VA Puget Sound Health Care System and University of Washington (Seattle, WA)***

Steven E. Kahn, MB, ChB\*  
Brenda K. Montgomery, RN, BSN, CDE\*\*  
Wilfred Fujimoto, MD  
Robert H. Knopp, MD  
Edward W. Lipkin, MD  
Michelle Marr, BA  
Dace Trence, MD

### ***University of Tennessee (Memphis, TN)***

Abbas E. Kitabchi, PhD, MD, FACP\*  
Mary E. Murphy, RN, MS, CDE, MBA\*\*  
William B. Applegate, MD, MPH  
Michael Bryer-Ash, MD  
Sandra L. Frieson, RN  
Raed Imseis, MD  
Helen Lambeth, RN, BSN  
Lynne C. Lichtermann, RN, BSN  
Hooman Oktaei, MD  
Lily M.K. Rutledge, RN, BSN  
Amy R. Sherman, RD, LD  
Clara M. Smith, RD, MHP, LDN  
Judith E. Soberman, MD  
Beverly Williams-Cleaves, MD

### ***Northwestern University's Feinberg School of Medicine (Chicago, IL)***

Boyd E. Metzger, MD\*  
Mariana K. Johnson, MS, RN\*\*  
Catherine Behrends  
Michelle Cook, MS  
Marian Fitzgibbon, PhD  
Mimi M. Giles, MS, RD  
Deloris Heard, MA  
Cheryl K.H. Johnson, MS, RN  
Diane Larsen, BS  
Anne Lowe, BS  
Megan Lyman, BS  
David McPherson, MD  
Mark E. Molitch, MD  
Thomas Pitts, MD  
Renee Reinhart, RN, MS  
Susan Roston, RN, RD

Pamela A. Schinleber, RN, MS

### ***Massachusetts General Hospital (Boston, MA)***

David M. Nathan, MD\*  
Charles McKittrick, BSN\*\*  
Heather Turgeon, BSN\*\*  
Kathy Abbott  
Ellen Anderson, MS, RD  
Laurie Bissett, MS, RD  
Enrico Cagliero, MD  
Jose C. Florez, MD, PhD+  
Linda Delahanty, MS, RD  
Valerie Goldman, MS, RD  
Alexandra Poulos

### ***University of California-San Diego (La Jolla, CA)***

Jerrold M. Olefsky, MD\*  
Elizabeth Barrett-Connor, MD\*  
Mary Lou Carrion-Petersen, RN, BSN\*\*  
Steven V. Edelman, MD  
Robert R. Henry, MD  
Javiva Horne, RD  
Simona Szerdi Janesch, BA  
Diana Leos, RN, BSN  
Sundar Mudaliar, MD  
William Polonsky, PhD  
Jean Smith, RN  
Karen Vejvoda, RN, BSN, CDE, CCRC

### ***St. Luke's-Roosevelt Hospital (New York, NY)***

F. Xavier Pi-Sunyer, MD\*  
Jane E. Lee, MS\*\*  
David B. Allison, PhD  
Nancy J. Aronoff, MS, RD  
Jill P. Crandall, MD  
Sandra T. Foo, MD  
Carmen Pal, MD  
Kathy Parkes, RN  
Mary Beth Pena, RN  
Ellen S. Rooney, BA  
Gretchen E.H. Van Wye, MA  
Kristine A. Viscovich, ANP

### ***Indiana University (Indianapolis, IN)***

David G. Marrero, PhD\*  
Melvin J. Prince, MD\*  
Susie M. Kelly, RN, CDE\*\*  
Yolanda F. Dotson, BS  
Edwin S. Fineberg, MD  
John C. Guare, PhD  
Angela M. Hadden  
James M. Ignaut, MA  
Marcia L. Jackson  
Marian S. Kirkman, MD  
Kieren J. Mather, MD  
Beverly D. Porter, MSN

## SUPPLEMENTARY DATA

Paris J. Roach, MD  
Nancy D. Rowland, BS, MS  
Madelyn L. Wheeler, RD

### ***Medstar Research Institute (Washington, DC)***

Robert E. Ratner, MD\*  
Gretchen Youssef, RD, CDE\*\*  
Sue Shapiro, RN, BSN, CCRC\*\*  
Catherine Bavido-Arrage, MS, RD, LD  
Geraldine Boggs, MSN, RN  
Marjorie Bronsord, MS, RD, CDE  
Ernestine Brown  
Wayman W. Cheatham, MD  
Susan Cola  
Cindy Evans  
Peggy Gibbs  
Tracy Kellum, MS, RD, CDE  
Claresa Levatan, MD  
Asha K. Nair, BS  
Maureen Passaro, MD  
Gabriel Uwaifo, MD

### ***University of Southern California/UCLA Research Center (Alhambra, CA)***

Mohammed F. Saad, MD\*  
Maria Budget\*\*  
Sujata Jinagouda, MD\*\*  
Khan Akbar, MD  
Claudia Conzues  
Perpetua Magpuri  
Kathy Ngo  
Amer Rassam, MD  
Debra Waters  
Kathy Xaphthalamous

### ***Washington University (St. Louis, MO)***

Julio V. Santiago, MD\* (deceased)  
Samuel Dagogo-Jack, MD, MSc, FRCP, FACP\*  
Neil H. White, MD, CDE\*  
Samia Das, MS, MBA, RD, LD\*\*  
Ana Santiago, RD\*\*  
Angela Brown, MD  
Edwin Fisher, PhD  
Emma Hurt, RN  
Tracy Jones, RN  
Michelle Kerr, RD  
Lucy Ryder, RN  
Cormarie Wernimont, MS, RD

### ***Johns Hopkins School of Medicine (Baltimore, MD)***

Christopher D. Saudek, MD\*  
Vanessa Bradley, BA\*\*  
Emily Sullivan, MEd, RN\*\*  
Tracy Whittington, BS\*\*  
Caroline Abbas

Frederick L. Brancati, MD, MHS  
Jeanne M. Clark, MD  
Jeanne B. Charleston, RN, MSN  
Janice Freel  
Katherine Horak, RD  
Dawn Jiggetts  
Deloris Johnson  
Hope Joseph  
Kimberly Loman  
Henry Mosley  
Richard R. Rubin, PhD  
Alafia Samuels, MD  
Kerry J. Stewart, EdD  
Paula Williamson

### ***University of New Mexico (Albuquerque, NM)***

David S. Schade, MD\*  
Karwyn S. Adams, RN, MSN\*\*  
Carolyn Johannes, RN, CDE\*\*  
Leslie F. Adler, PhD  
Patrick J. Boyle, MD  
Mark R. Burge, MD  
Janene L. Canady, RN, CDE  
Lisa Chai, RN  
Ysela Gonzales, RN, MSN  
Doris A. Hernandez-McGinnis  
Patricia Katz, LPN  
Carolyn King  
Amer Rassam, MD  
Sofya Rubinchik, MD  
Willette Senter, RD  
Debra Waters, PhD

### ***Albert Einstein College of Medicine (Bronx, NY)***

Harry Shamoon, MD\*  
Janet O. Brown, RN, MPH, MSN\*\*  
Elsie Adorno, BS  
Liane Cox, MS, RD  
Jill Crandall, MD  
Helena Duffy, MS, C-ANP  
Samuel Engel, MD  
Allison Friedler, BS  
Crystal J. Howard-Century, MA  
Stacey Kloiber, RN  
Nadege Longchamp, LPN  
Helen Martinez, RN, MSN, FNP-C  
Dorothy Pompei, BA  
Jonathan Scheindlin, MD  
Elissa Violino, RD, MS  
Elizabeth Walker, RN, DNSc, CDE  
Judith Wylie-Rosett, EdD, RD  
Elise Zimmerman, RD, MS  
Joel Zonszein, MD

### ***University of Pittsburgh (Pittsburgh, PA)***

Trevor Orchard, MD\*

## SUPPLEMENTARY DATA

Marinella Temprosa, PhD  
Fredricka Walker-Murray

### ***Central Biochemistry Laboratory (Seattle, WA)***

Santica Marcovina, PhD, ScD\*  
Greg Strylewicz, PhD\*\*  
F. Alan Aldrich

### ***Carotid Ultrasound***

Dan O'Leary, MD\*

### ***CT Scan Reading Center***

Elizabeth Stamm, MD\*

### ***Epidemiological Cardiology Research Center-Epicare (Winston-Salem, NC)***

Pentti Rautaharju, MD, PhD\*  
Ronald J. Prineas, MD, PhD\*/\*  
Teresa Alexander  
Charles Campbell, MS  
Sharon Hall  
Yabing Li, MD  
Margaret Mills  
Nancy Pemberton, MS  
Farida Rautaharju, PhD  
Zhuming Zhang, MD

### ***Nutrition Coding Center (Columbia, SC)***

Elizabeth Mayer-Davis, PhD\*  
Robert R. Moran, PhD\*\*

### ***Quality of Well-Being Center (La Jolla, CA)***

Ted Ganiats, MD\*  
Kristin David, MHP\*  
Andrew J. Sarkin, PhD\*  
Erik Groessl, PhD

### ***NIH/NIDDK (Bethesda, MD)***

R. Eastman, MD  
Judith Fradkin, MD  
Sanford Garfield, PhD

### ***Centers for Disease Control & Prevention (Atlanta, GA)***

Edward Gregg, PhD  
Ping Zhang, PhD

### ***University of Michigan (Ann Arbor, MI)***

William H. Herman, MD, MPH

### ***+Genetics Working Group***

Jose C. Florez, MD, PhD<sup>1,2</sup>  
David Altshuler, MD, PhD<sup>1,2</sup>  
Liana K. Billings, MD<sup>1</sup>  
Ling Chen, MS<sup>1</sup>  
Maegan Harden, BS<sup>2</sup>

Robert L. Hanson, MD, MPH<sup>3</sup>  
William C. Knowler, MD, DrPH<sup>3</sup>  
Toni I. Pollin, PhD<sup>4</sup>  
Alan R. Shuldiner, MD<sup>4</sup>  
Kathleen Jablonski, PhD<sup>5</sup>  
Paul W. Franks, PhD, MPhil, MS<sup>6,7,8</sup>  
Marie-France Hivert, MD<sup>9</sup>

1=Massachusetts General Hospital

2=Broad Institute

3=NIDDK

4=University of Maryland

5=Coordinating Center

6=Lund University, Sweden

7=Umeå University, Sweden

8=Harvard School of Public Health

9=Université de Sherbrooke
